# Supplementary material
Source: PubMed Central journal article supplement (PMC8530457)
Supplement: NIHMS1703186-supplement-Supplemental_Section.pdf [file NIHMS1703186-supplement-Supplemental_Section.pdf]

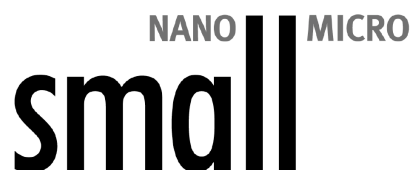

## Supporting Information

for *Small*, DOI: 10.1002/sml.201902864

**Combinatorial Delivery of miRNA-Nanoparticle Conjugates  
in Human Adipose Stem Cells for Amplified Osteogenesis**

*Mohammad Abu-Laban, Prakash Hamal, Julien H.  
Arrizabalaga, Anoosha Forghani, Asela S. Dikkumbura, Raju  
R. Kumal, Louis H. Haber, and Daniel J. Hayes\**

Copyright WILEY-VCH Verlag GmbH & Co. KGaA, 69469 Weinheim, Germany, 2019.

## Supporting Information

### Combinatorial delivery of miRNA-nanoparticle conjugates in human adipose stem cells for amplified osteogenesis

*Mohammad Abu-Laban<sup>1</sup>, Prakash Hamal<sup>2</sup>, Julien H. Arrizabalaga<sup>1</sup>, Anoosha Forghani<sup>1</sup>, Asela S. Dikkumbura<sup>2</sup>, Raju R. Kumal<sup>3</sup>, Louis H. Haber<sup>2</sup> and Daniel J. Hayes<sup>1, 4, 5\*</sup>*

<sup>1</sup> The Department of Biomedical Engineering, The Pennsylvania State University, University Park, Pennsylvania 16802

<sup>2</sup> The Department of Chemistry, Louisiana State University, Baton Rouge, Louisiana 70803

<sup>3</sup> John and Willie Leone Family Department of Energy and Mineral Engineering, Pennsylvania State University, University Park, Pennsylvania 16802

<sup>4</sup> Materials Research Institute, Millennium Science Complex, Pennsylvania State University, University Park, Pennsylvania 16802

<sup>5</sup> The Huck Institute of the Life Sciences, Millennium Science Complex, Pennsylvania State University, University Park, Pennsylvania 16802

\*Corresponding author: djh195@psu.edu

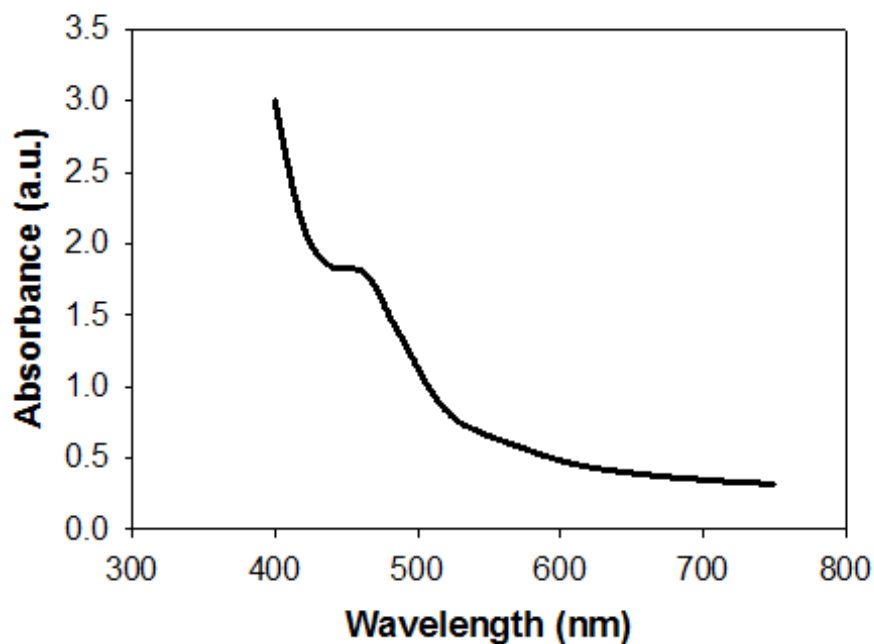

**Figure S1.** Absorbance spectra of Diels-Alder linker

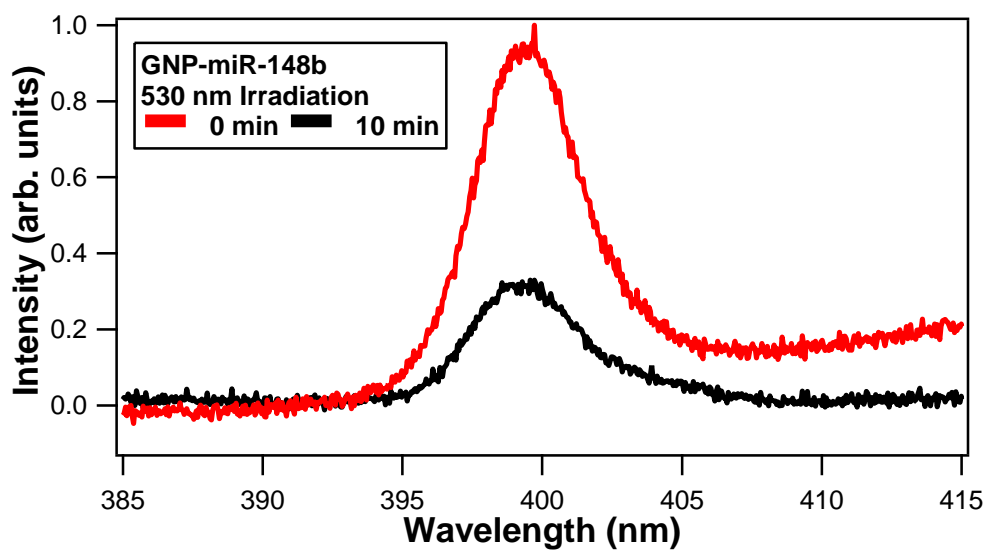

**Figure S2.** Representative SHG spectra of miRNA-functionalized gold nanoparticles at different wavelengths and irradiation times.

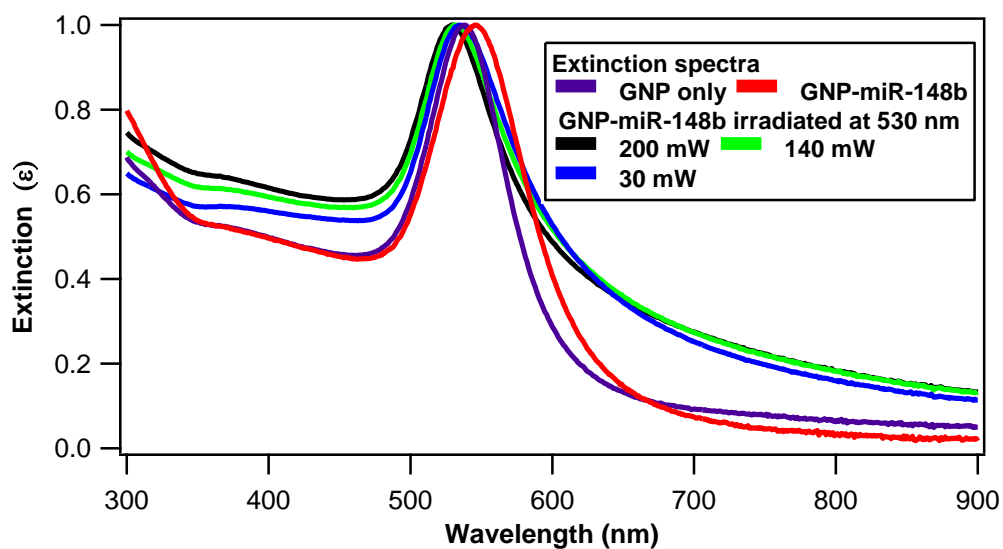

**Figure S3.** Extinction spectra of the GNPs, the miRNA-functionalized GNPs, and the miRNA-functionalized GNPs after laser irradiation with 530 nm wavelength.

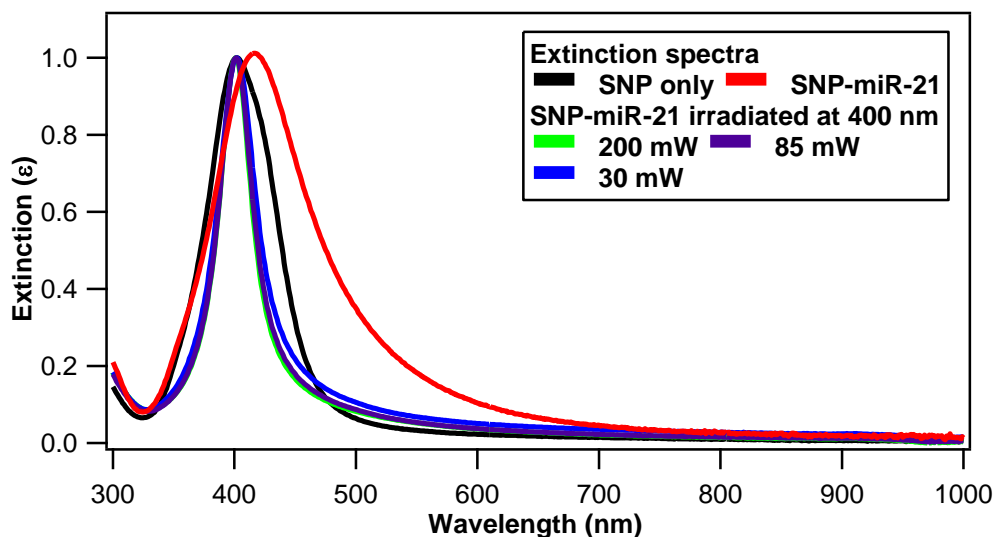

**Figure S4.** Extinction spectra of the SNPs, the miRNA-functionalized SNPs, and the miRNA-functionalized SNPs after laser irradiation with 400 nm wavelength.

**Table S1:** Fit parameters obtained for the SNP-miR-21 nanoparticle system at different 400 nm laser powers

| Power<br>(mW) | Fit Parameters (SNP-miR-21) |                   |                              |
|---------------|-----------------------------|-------------------|------------------------------|
|               | A                           | B                 | $k (10^{-2} \text{ S}^{-1})$ |
| 35            | $0.652 \pm 0.001$           | $0.353 \pm 0.005$ | $0.85 \pm 0.02$              |
| 85            | $0.603 \pm 0.001$           | $0.405 \pm 0.005$ | $1.23 \pm 0.03$              |
| 140           | $0.553 \pm 0.001$           | $0.432 \pm 0.007$ | $1.80 \pm 0.05$              |
| 200           | $0.504 \pm 0.001$           | $0.472 \pm 0.012$ | $2.67 \pm 0.13$              |

**Table S2:** Fit parameters obtained for the GNP-miR-148b nanoparticle system at different 530 nm laser powers

| Power<br>(mW) | Fit Parameters (GNP-miR-148b) |                   |                              |
|---------------|-------------------------------|-------------------|------------------------------|
|               | A                             | B                 | $k (10^{-2} \text{ S}^{-1})$ |
| 35            | $0.803 \pm 0.001$             | $0.188 \pm 0.005$ | $0.82 \pm 0.04$              |
| 85            | $0.754 \pm 0.001$             | $0.242 \pm 0.006$ | $1.03 \pm 0.04$              |

|     |                   |                   |                 |
|-----|-------------------|-------------------|-----------------|
| 140 | $0.699 \pm 0.001$ | $0.298 \pm 0.005$ | $1.34 \pm 0.04$ |
| 200 | $0.635 \pm 0.001$ | $0.356 \pm 0.008$ | $2.04 \pm 0.09$ |

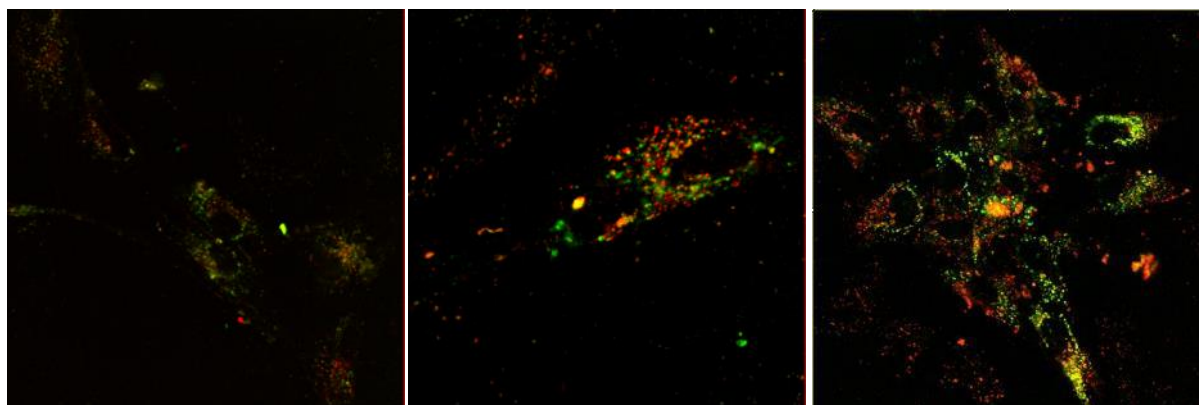

Z Stack images of none irradiated (top) and 405 nm irradiated (bottom) SNP-FAM-transferrin samples

None

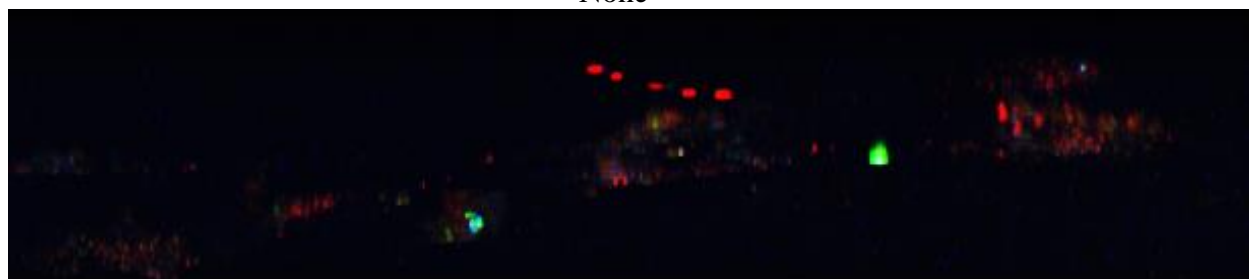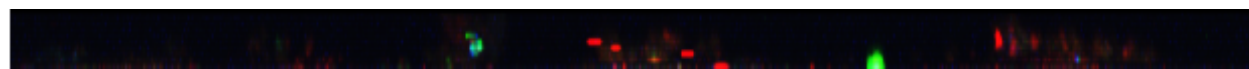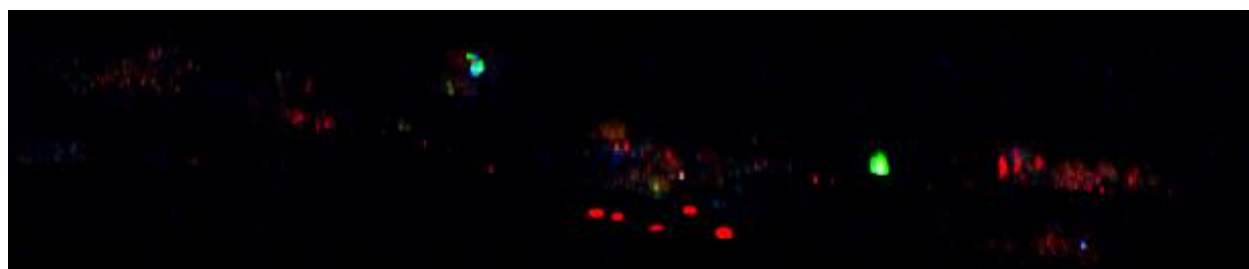

405nm

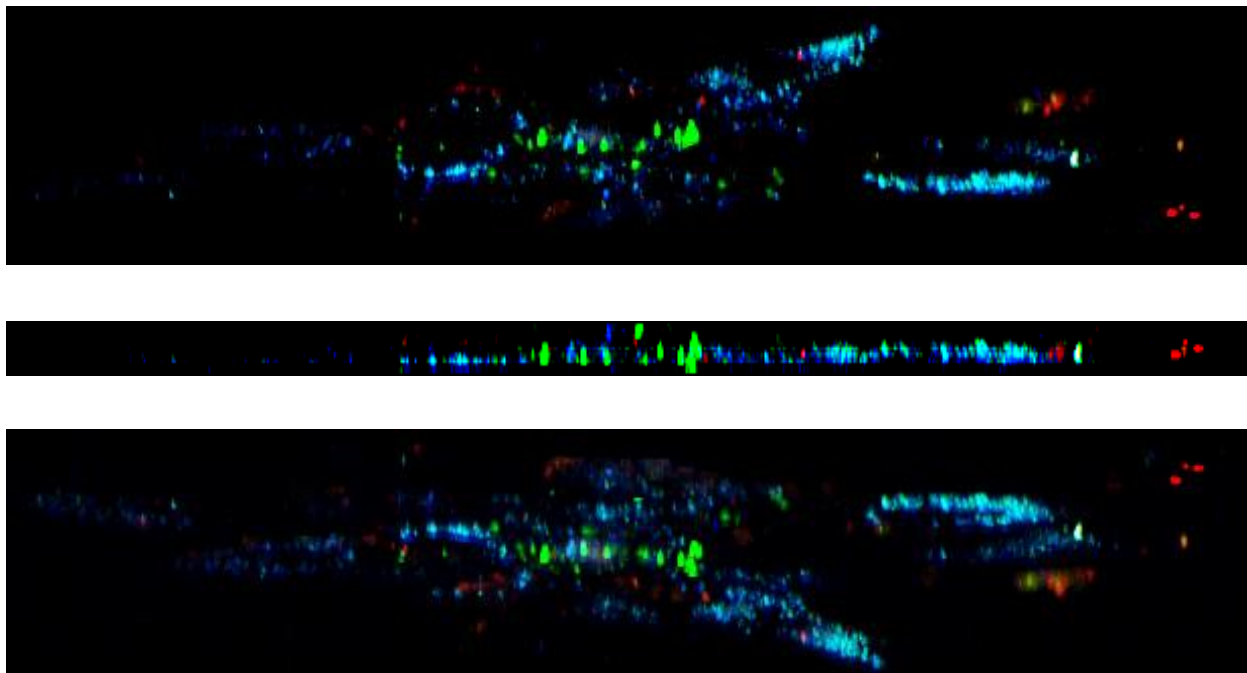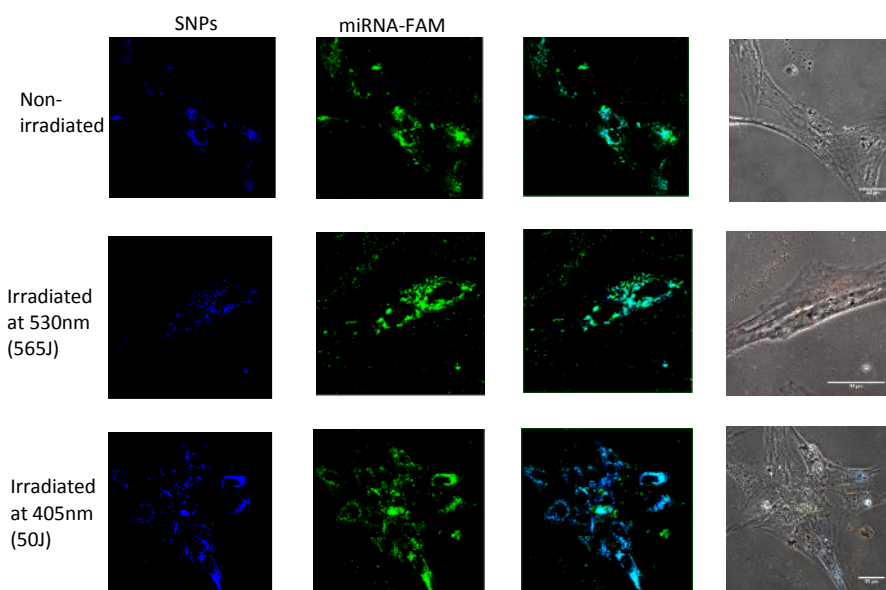

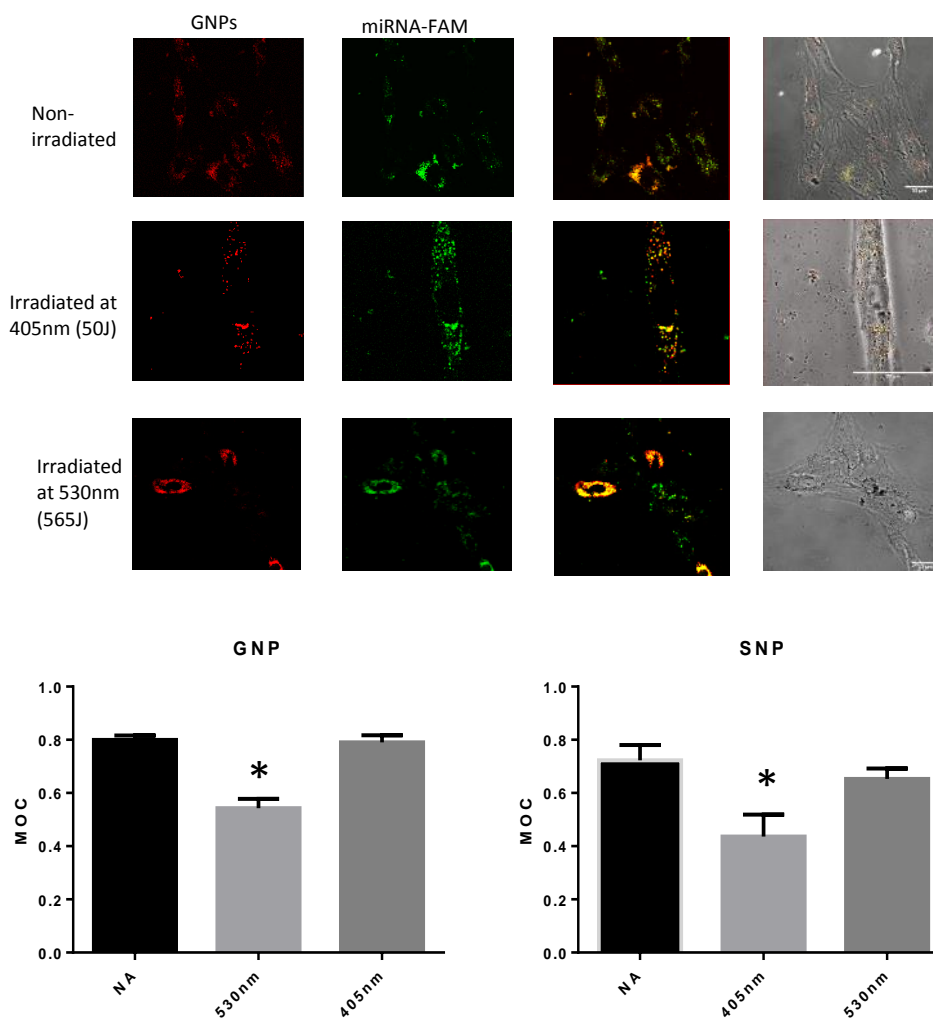

**Figure S5.** Tansferrin staining of SNPs, z-stack images of SNP/GNP with FAM-miRNA molecules, and plotted Mander's coefficient values for each NP and group.

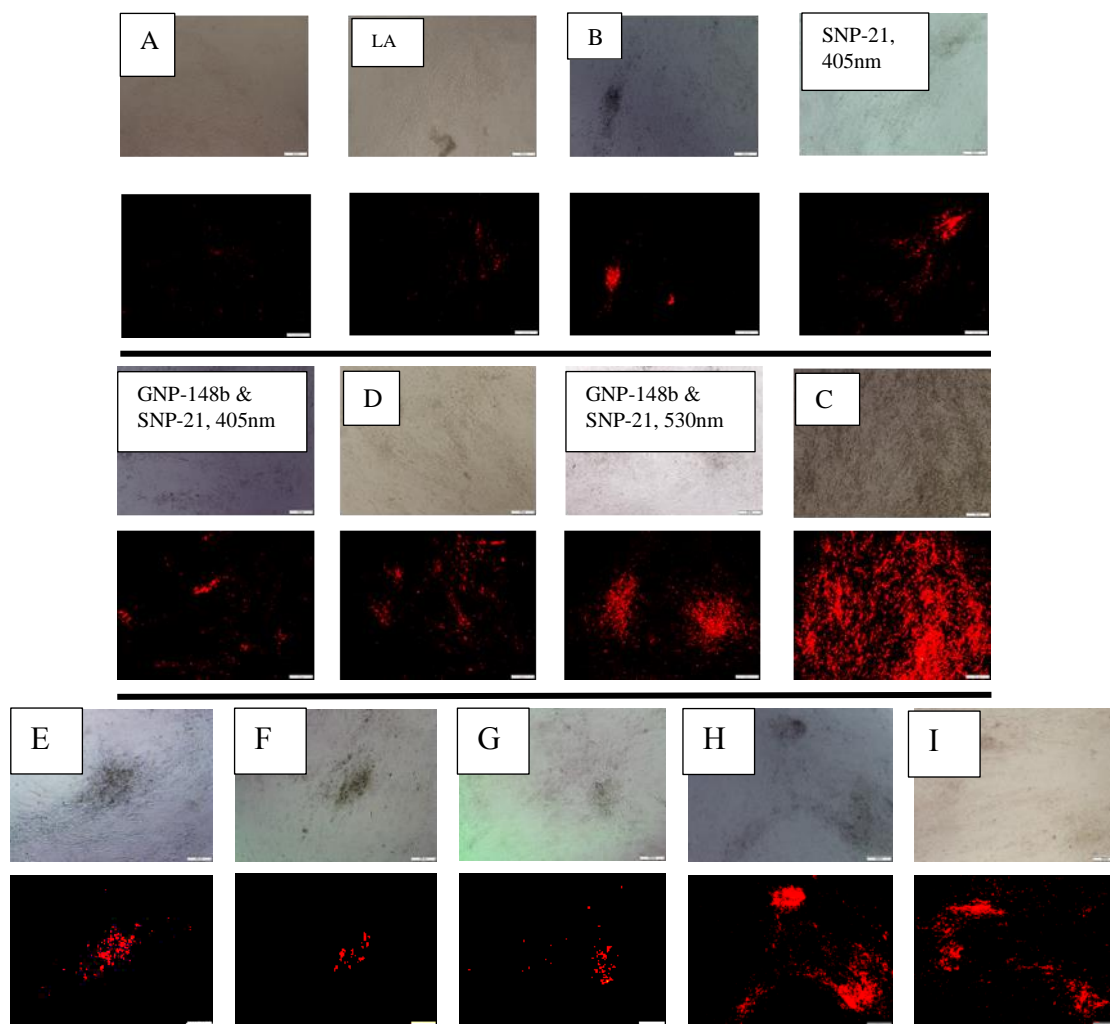

Figure S6. Xylene Orange images for all NP groups tested

Table S3. ARS images for all NP groups tested

|                                                                             |  |  |  |
|-----------------------------------------------------------------------------|--|--|--|
| <b>Stromal Medium (A)</b>                                                   |  |  |  |
| <b>Osteogenic Medium (C)</b>                                                |  |  |  |
| <b>GNPs &amp; SNPs non-modified, irradiated at 405 nm &amp; 530 nm (LA)</b> |  |  |  |



|                                                                               |                                                                                     |                                                                                      |                                                                                       |
|-------------------------------------------------------------------------------|-------------------------------------------------------------------------------------|--------------------------------------------------------------------------------------|---------------------------------------------------------------------------------------|
| <p><b>GNP-miR-148b &amp; SNP-miR-21, non-irradiated (B)</b></p>               | 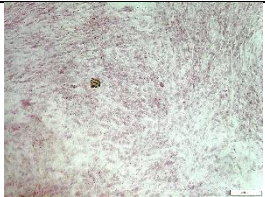   |                                                                                      |                                                                                       |
| <p><b>SNP-miR-21, 405 nm</b></p>                                              |    |                                                                                      |                                                                                       |
| <p><b>GNP-miR-148b, 530 nm (D)</b></p>                                        |    |                                                                                      |                                                                                       |
| <p><b>SNP-miR-21 GNP-miR-148b, 405 nm</b></p>                                 |    |    |                                                                                       |
| <p><b>SNP-miR-21 GNP-miR-148b, 530 nm</b></p>                                 |   |                                                                                      |                                                                                       |
| <p><b>SNP-miR-21 GNP-miR-148b, 405 nm &amp; 530 nm 0 h (E)</b></p>            |  |  |  |
| <p><b>SNP-miR-21 GNP-miR-148b, 405 nm at 0 h &amp; 530 nm at 24 h (F)</b></p> |  |  |  |
| <p><b>SNP-miR-21 GNP-miR-148b, 405 nm at 0 h &amp; 530 nm at 48 h (G)</b></p> |  |  |  |
| <p><b>SNP-miR-21 GNP-miR-148b, 530 nm at 0 h &amp; 405 nm at 24 h (H)</b></p> |  |  |                                                                                       |

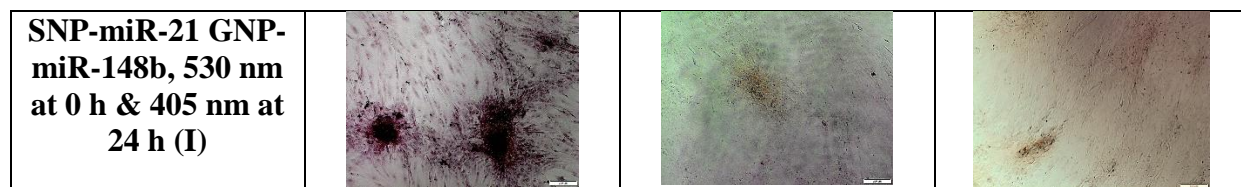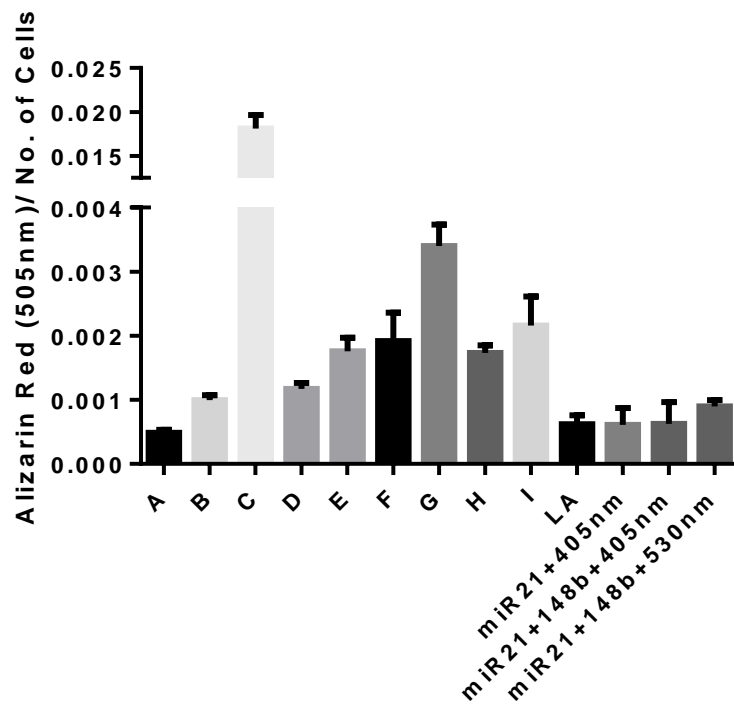

Figure S7. ARS quantification for all NP groups normalized to cell count

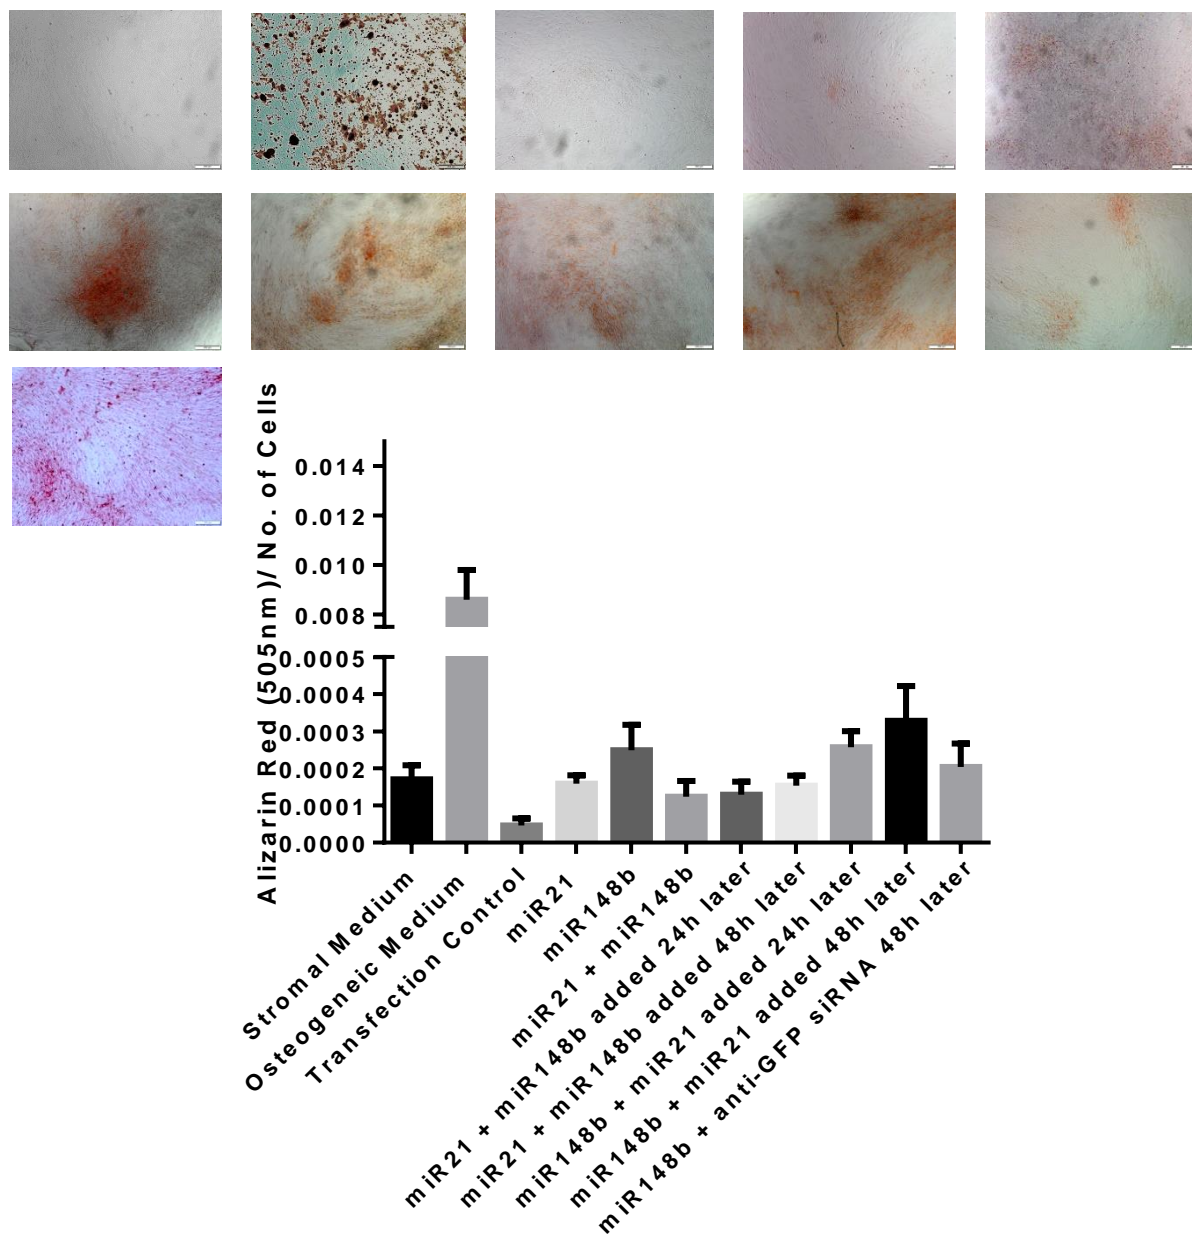

**Figure S8.** Chemical transfection groups ARS (images presented in same order, left to right/top to bottom, as listed on x-axis of graph)

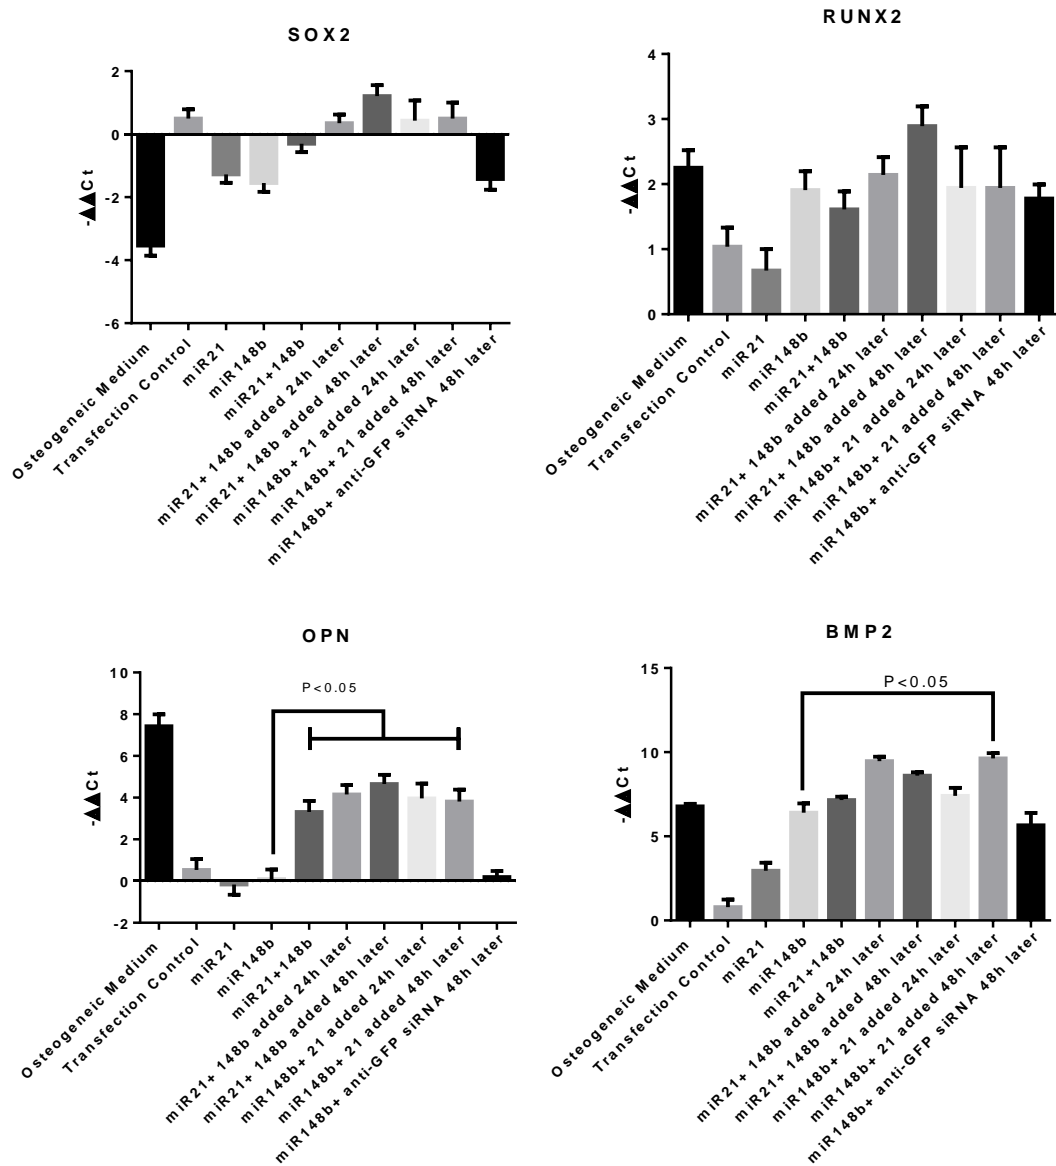

Figure S9. Chemical transfection groups PCR day 21

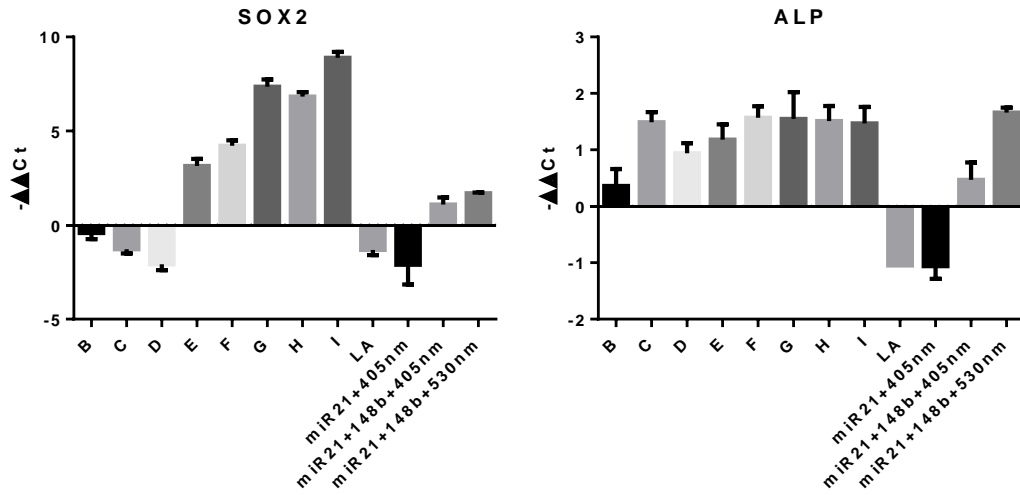

Figure S10. All NP groups PCR day 7

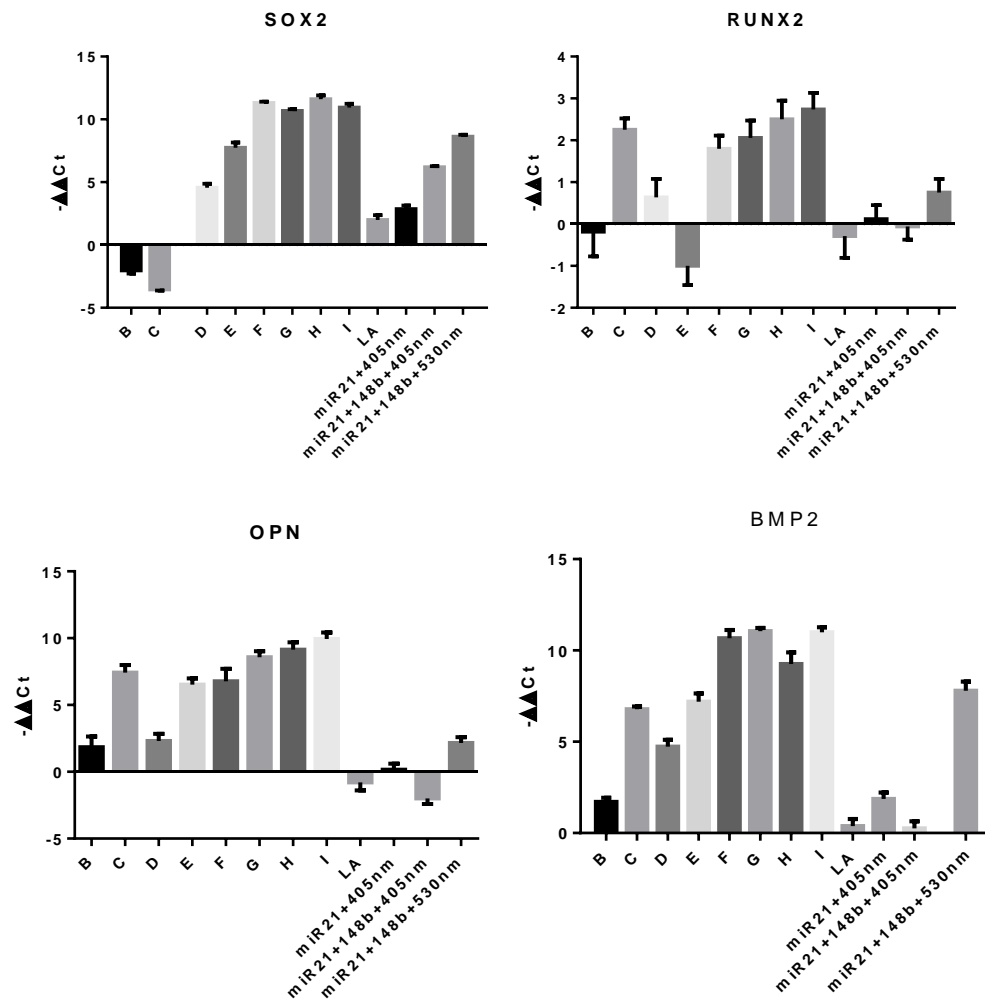

Figure S11. All NP groups PCR day 21

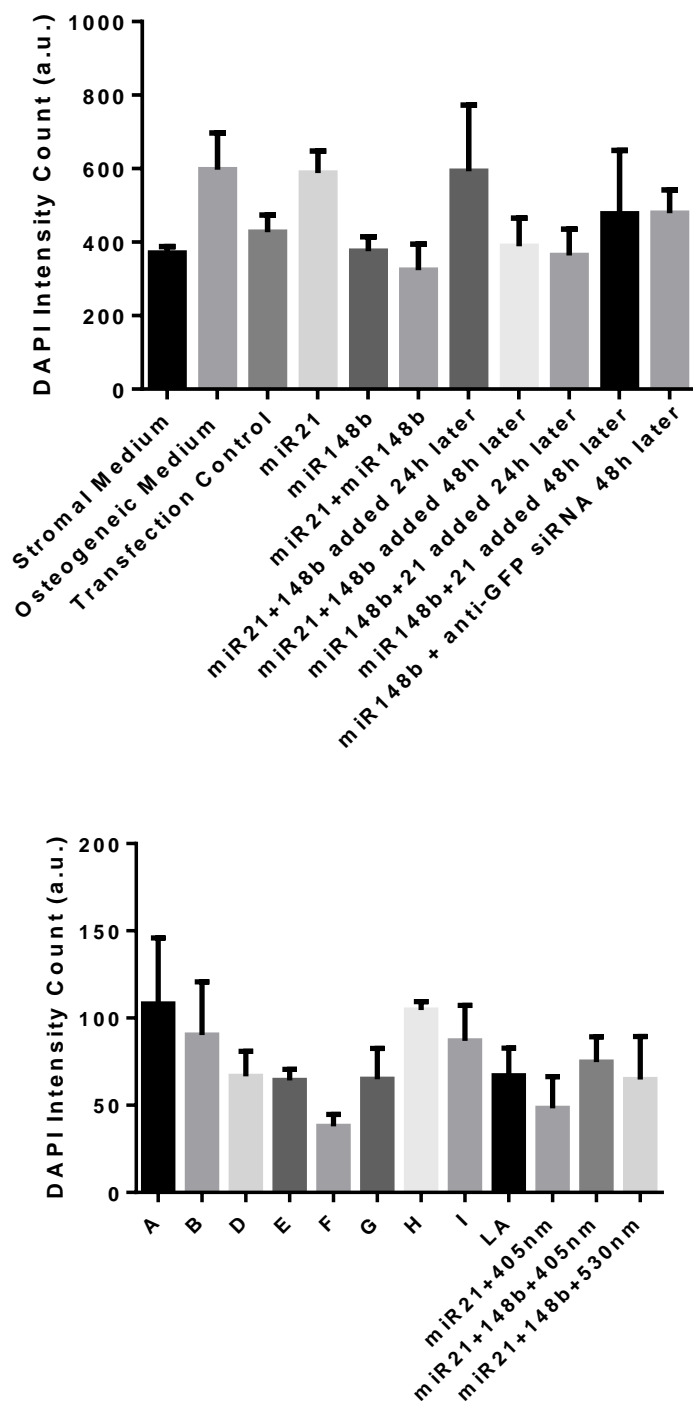

**Figure S12.** DAPI/Cell count at Day 21 for chemical transfection (top) and NP groups (bottom)

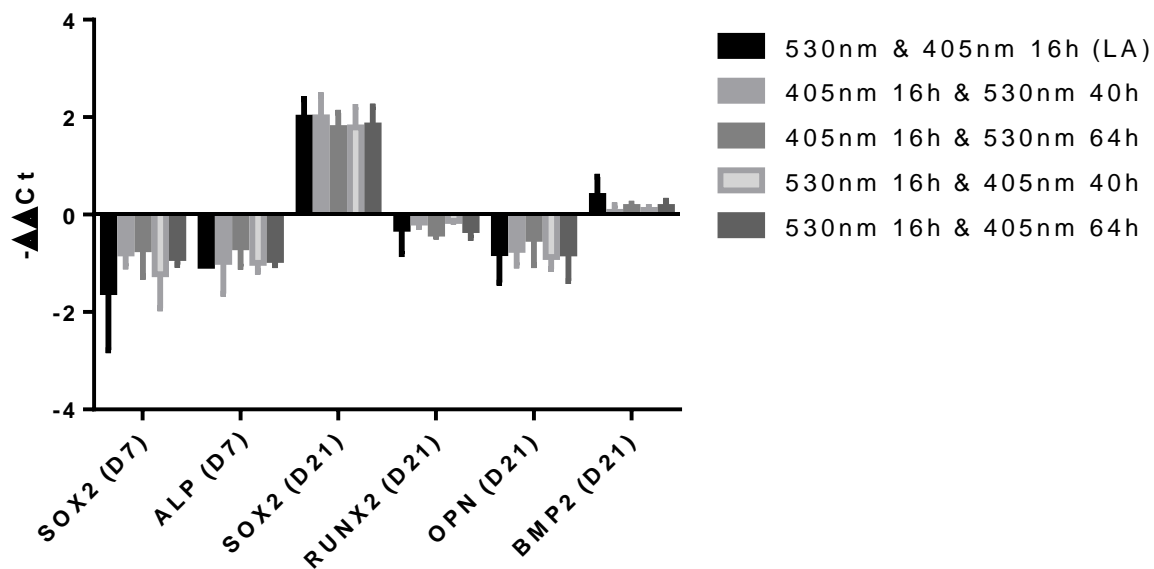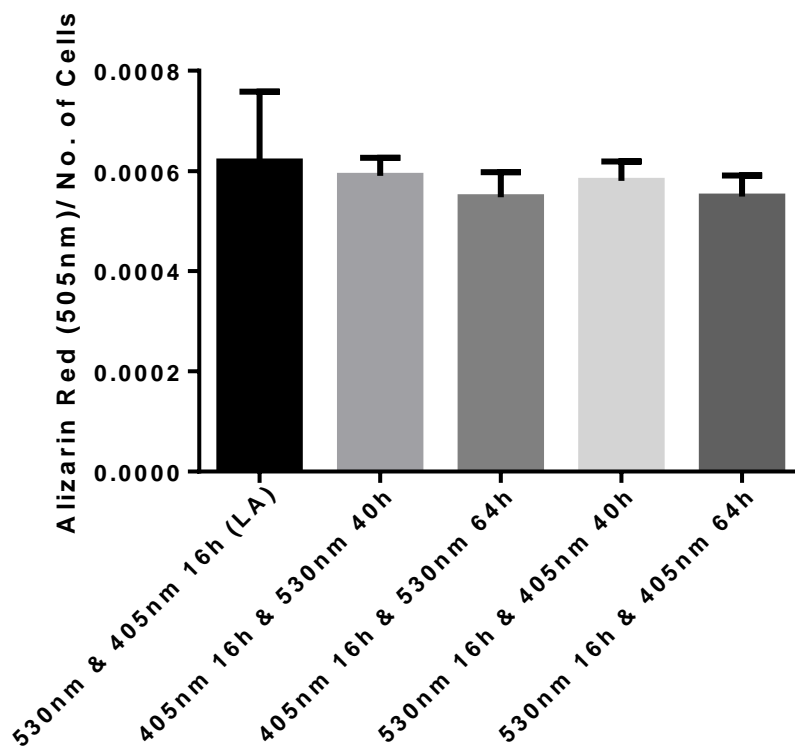

**Figure S13.** PCR and ARS for light-activated control groups at different timepoints.

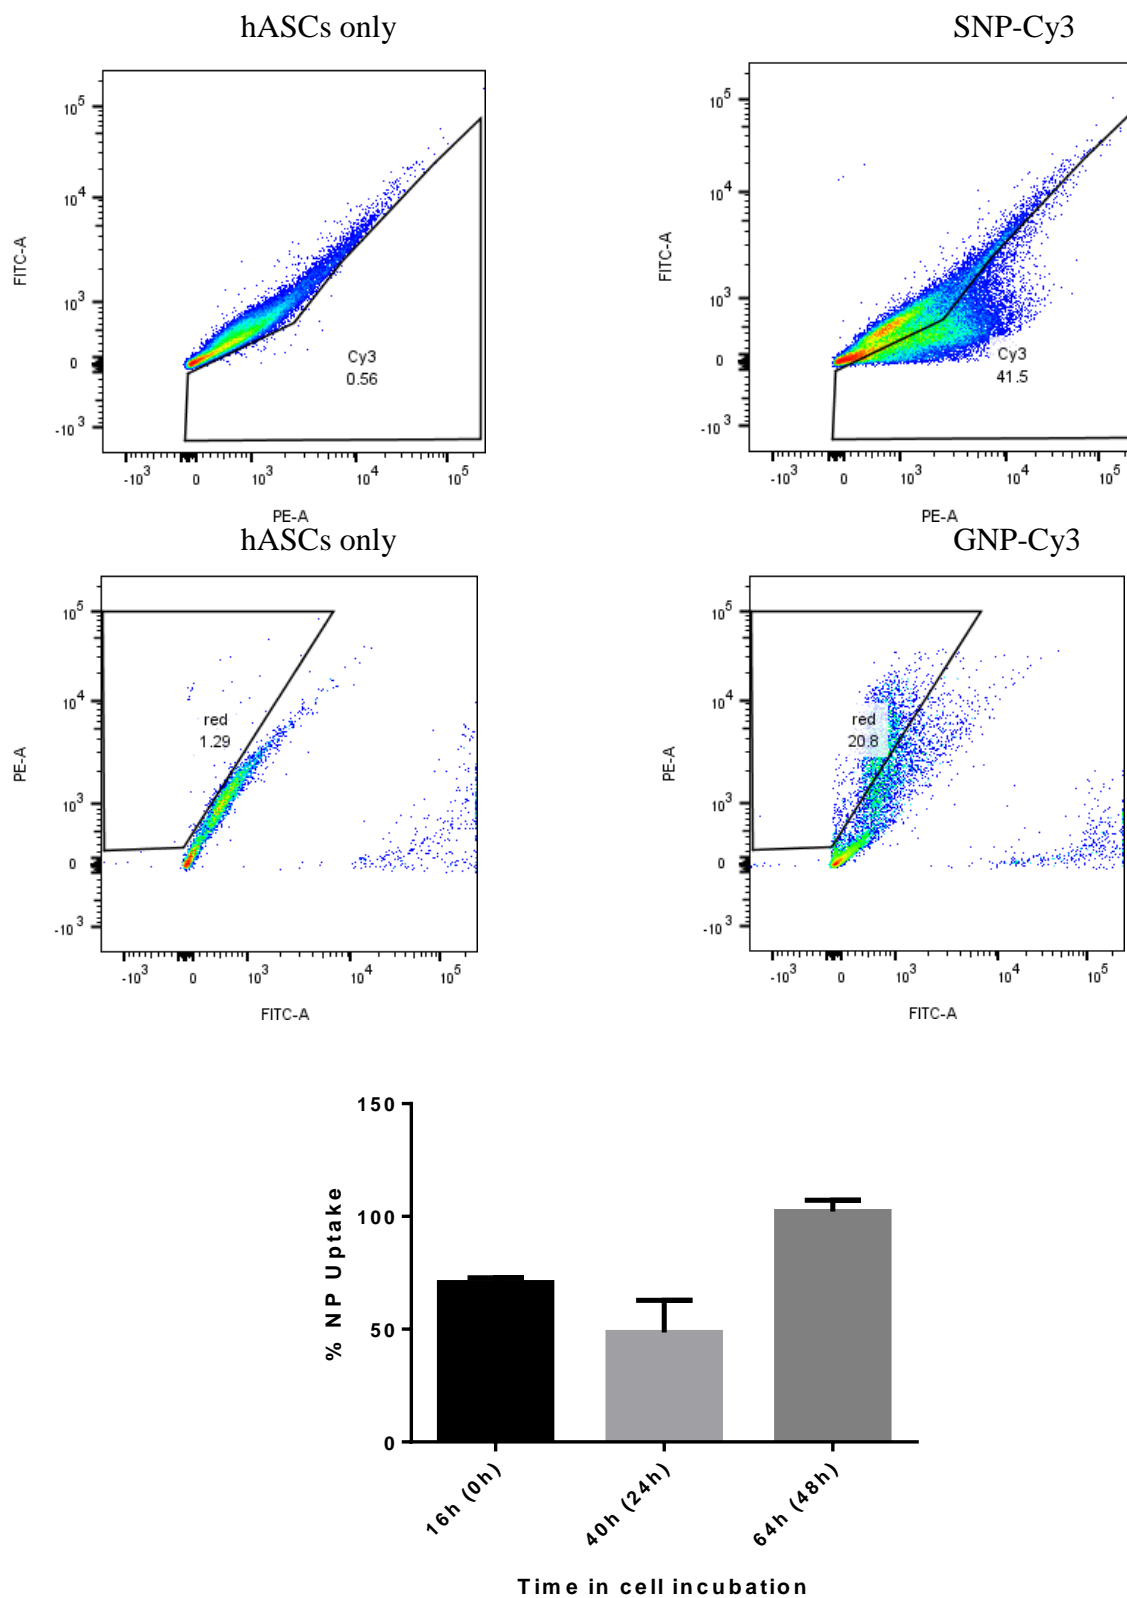

**Figure S14.** Transfection efficiencies of SNPs and GNPs in hASCs, measured using Flow Cytometry of Cy3 conjugated miRNA mimics, and uptake efficiency of SNPs using ICP-AES.



**Table S3.** Summary of gene targets for hsa-miR148b-3p, generated from microRNA.org search database. Shown ten results from a total of 700+. Gene function derived from <https://ghr.nlm.nih.gov/gene>

| miR148b mRNA target | mirSVR score | Gene function                                                             |
|---------------------|--------------|---------------------------------------------------------------------------|
| COL10A1             | -1.20        | Chondrogenic marker<br>(Transactivated by RUNX2)                          |
| <b>NOG</b>          | <b>-1.20</b> | <b>BMP down-regulation</b>                                                |
| TCF12               | -1.17        | Maintains pluripotency/<br>high expression in<br>undifferentiated BMSCs   |
| ZFPM2               | -1.21        | Runx2 antagonist                                                          |
| SNX2                | -1.08        | Endocytic protein sorting                                                 |
| PIGA                | -1.10        | Part of membrane anchoring<br>protein                                     |
| FMR1                | -1.23        | Transport mRNA between<br>cells                                           |
| BTAFF1              | -1.31        | Required for transcription<br>initiation of genes by RNA<br>polymerase II |
| TAF4                | -1.25        | Required for transcription<br>initiation of genes by RNA<br>polymerase II |
| BPY2                | -1.24        | Male germ cell development<br>and male infertility                        |

**Table S4.** Summary of gene targets for hsa-miR21b-3p, generated from microRNA.org search database. Shown eight results from a total of 700+. Gene function derived from <https://ghr.nlm.nih.gov/gene>

| miR21 mRNA target | mirSVR score | Gene function                                                                                                           |
|-------------------|--------------|-------------------------------------------------------------------------------------------------------------------------|
| TGFBII            | -1.10        | TGFB receptors leading to recruitment and activation of SMAD family transcription factors that regulate gene expression |
| SOX2              | -1.17        | Pluripotency regulator/self-renewal                                                                                     |
| SOS2              | -1.26        | Regulatory protein that is involved in the positive regulation of ras proteins                                          |
| SOX4              | -0.8421      | Protein may function in the apoptosis pathway leading to cell death as well as to tumorigenesis                         |
| SOX5              | -1.14        | Endochondral Ossification                                                                                               |
| OMD               | -1.18        | Biom mineralization processes / osteoblast binding                                                                      |
| FGF7              | -1.16        | Keratinocyte growth factor                                                                                              |
| SMAP2             | -0.868       | Endocytosis                                                                                                             |
